# Supplementary material for: Potential Mechanisms of Yiqi Jiedu Huayu Decoction in the Treatment of Diabetic Microvascular Complications Based on Network Analysis, Molecular Docking, and Experimental Validation
Source: Hindawi journal article supplement (doi:10.1155/2023/5034687), 2023-01-01
Supplement: f1 [file 5034687.f1.pdf]

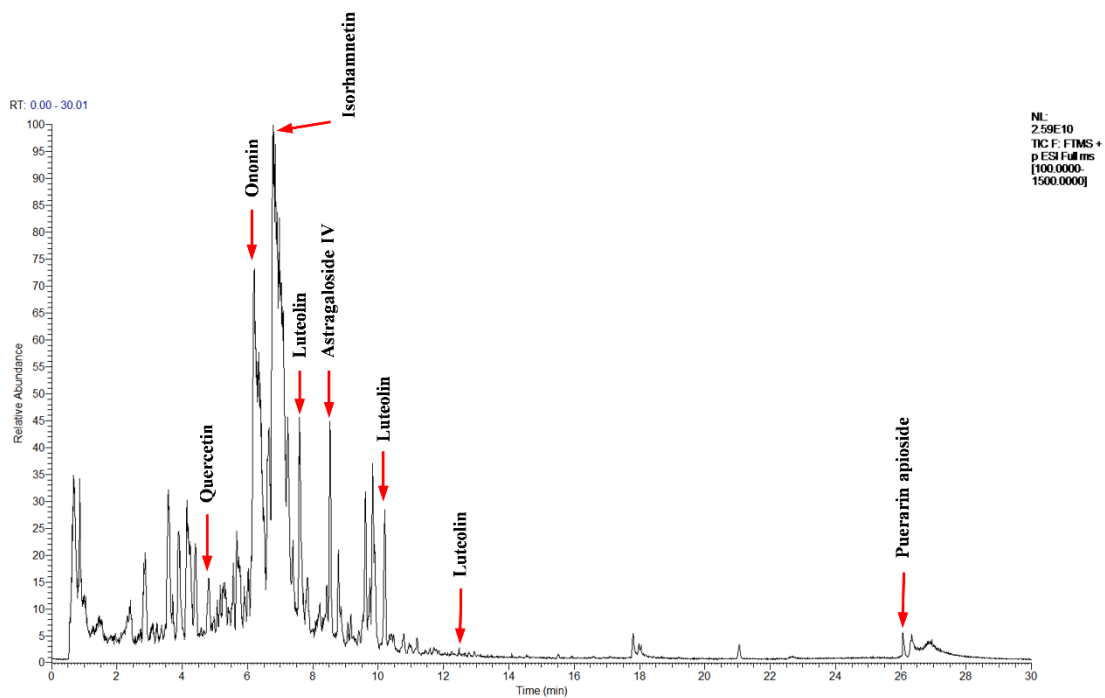

TIC diagram of UHPLC-Q Exactive-MS detection of YJHD granule aqueous solution in positive ion mode.

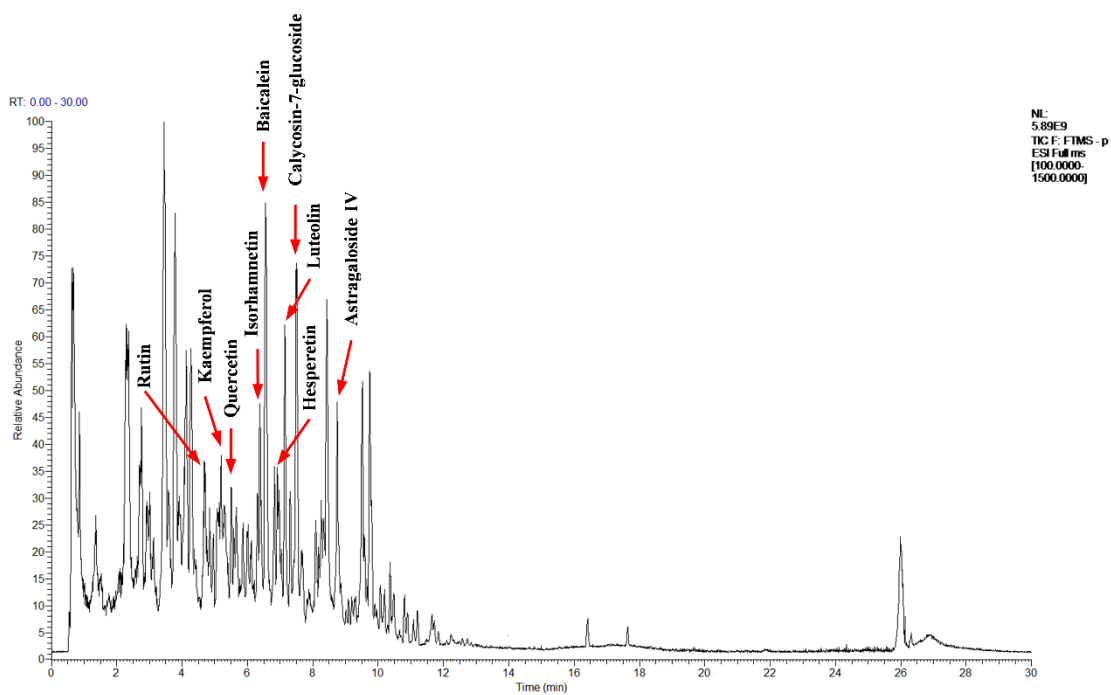

TIC diagram of UHPLC-Q Exactive-MS detection of YJHD granule aqueous solution in negative ion mode.
